# Supplementary material for: Unusual red luminescence and super thermal stability of a new narrow-band emission phosphor for backlight display application
Source: Royal Society of Chemistry journal article supplement (doi:10.1039/d3tc03555g), 2023-12-15
Supplement: d3tc03555g1.pdf [file d3tc03555g1.pdf]

## Electronic Supplementary Information:

### Unusual red luminescence and super thermal stability of a new narrow band emission phosphor for backlight display application

Qiu Zong <sup>a</sup>, Dan Zhao <sup>a,\*</sup>, Rui-Juan Zhang <sup>a</sup>, Qing-Xia Yao <sup>b,\*</sup>, Lei Jia <sup>a</sup>, Meng-Han Yu

<sup>a</sup>

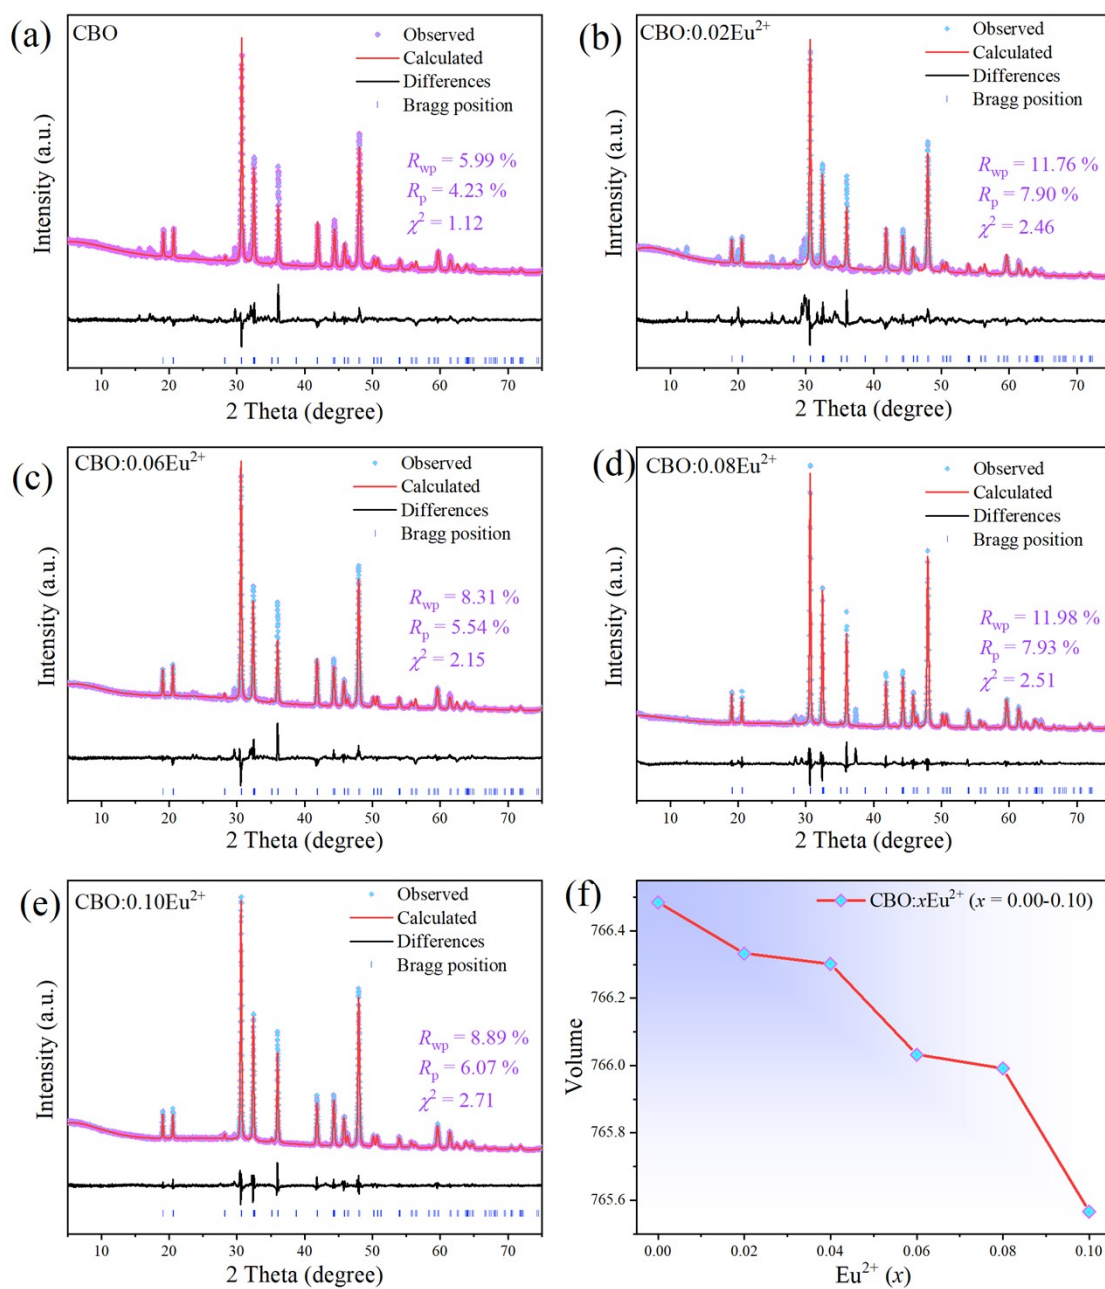

**Figure S1.** The rietveld refinement of the powder XRD profiles of (a) CBO, (b) CBO:0.02Eu<sup>2+</sup>, (c) CBO:0.06Eu<sup>2+</sup>, (d) CBO:0.08Eu<sup>2+</sup>, and (e) CBO:0.10Eu<sup>2+</sup>, respectively; (f) The Volume of CBO:xEu<sup>2+</sup> (x = 0.00-0.10).

Table S1. Refined Crystallographic Parameters of the CBO: $x$ Eu $^{2+}$  ( $x = 0-0.10$ ) Samples.

| $x$                      | 0.00             | 0.02             | 0.04             | 0.06             | 0.08             | 0.10             |
|--------------------------|------------------|------------------|------------------|------------------|------------------|------------------|
| Crystal System           | Trigonal system  |                  |                  |                  |                  |                  |
| Space Group              | $R\text{-}3c$    |                  |                  |                  |                  |                  |
| $a$ (Å)                  | 8.6331<br>(139)  | 8.6316<br>(151)  | 8.6289<br>(204)  | 8.6313<br>(123)  | 8.6330<br>(141)  | 8.6326<br>(89)   |
| $c$ (Å)                  | 11.8681<br>(280) | 11.8794<br>(299) | 11.8725<br>(405) | 11.8777<br>(245) | 11.8679<br>(284) | 11.8736<br>(175) |
| $\beta$ (Å)              | 90               | 90               | 90               | 90               | 90               | 90               |
| $\gamma$ (Å)             | 120              | 120              | 120              | 120              | 120              | 120              |
| $V$ (Å $^3$ )            | 766.485<br>(27)  | 766.333<br>(29)  | 766.302<br>(39)  | 766.032<br>(24)  | 765.991<br>(27)  | 765.566<br>(18)  |
| $U_{iso}$                | 0.03959          | 0.03879          | 0.03390          | 0.02217          | 0.00946          | 0.00399          |
| 2 $\theta$ -Interval (°) | 5-75             |                  |                  |                  |                  |                  |
| $Z$                      | 6                |                  |                  |                  |                  |                  |
| $R_{wp}$ (%)             | 5.99             | 11.76            | 11.60            | 8.31             | 11.98            | 8.89             |
| $R_p$ (%)                | 4.23             | 7.90             | 7.87             | 5.54             | 7.93             | 6.07             |
| $\chi^2$                 | 1.12             | 2.46             | 1.51             | 2.15             | 2.51             | 2.71             |

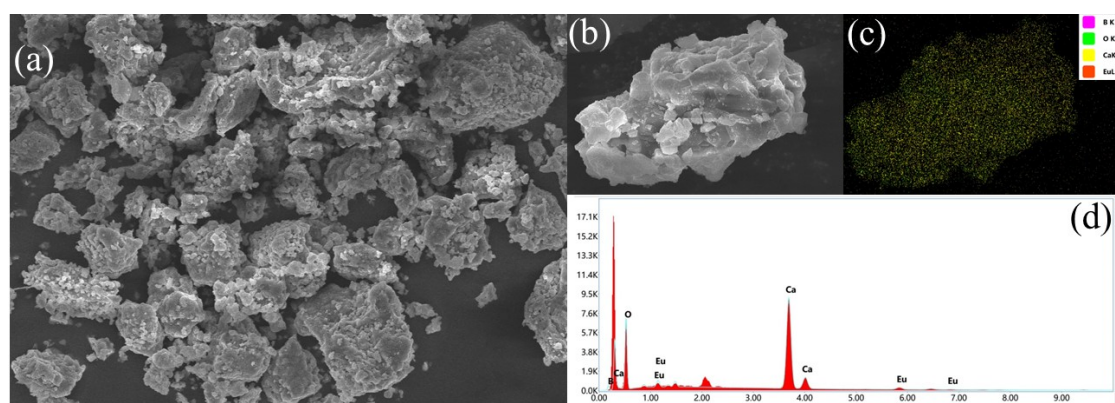

**Figure S2.** (a) and (b) SEM diagrams of CBO:Eu $^{2+}$  phosphor at different magnification; (c) element mappings of Ca, B, O and Eu; (d) element content analysis of Ca, B, O and Eu.

Table S2. Optical properties of CBO:Eu<sup>2+</sup> and commercial phosphors.

| phosphor                                           | The strongest PLE peak | PLE range  | The strongest PL peak | PL range   | FWHM           |
|----------------------------------------------------|------------------------|------------|-----------------------|------------|----------------|
| Sr <sub>2</sub> SiN <sub>8</sub> :Eu <sup>2+</sup> | ~395 nm<br>~450 nm     | 250-570 nm | 610 nm                | 500-750 nm | 85 nm          |
| Y <sub>2</sub> O <sub>3</sub> :Eu <sup>3+</sup>    | 260 nm                 | 230-600 nm | 624 nm                | 500-730 nm | Sharp emission |
| CaAlSiN <sub>3</sub> :Eu <sup>2+</sup>             | 466 nm                 | 200-600 nm | 650 nm                | 500-800 nm | 100 nm         |
| K <sub>2</sub> SiF <sub>6</sub> :Mn <sup>4+</sup>  | ~420 nm<br>~455 nm     | 300-500 nm | 631 nm                | 610-650 nm | Sharp emission |
| CBO:Eu <sup>2+</sup>                               | 465 nm                 | 400-625 nm | 640 nm                | 570-725 nm | 50 nm          |

Thanks to highly condensed network structure, CBO:0.04Eu<sup>2+</sup> shows a surprising narrow-band red emission at 640 nm with FWHM of only 50 nm under 465 nm excitation. Therefore, such PLE band of CBO:0.04Eu<sup>2+</sup> matches well with the blue LED chip. As shown in the inset (Fig. 3b), the as-prepared powder gives a red light under 365 nm lamp irradiation, and CBO:0.04Eu<sup>2+</sup> displays a pale red body color under natural light which is since the phosphor absorbs part of the short-wavelength visible light. Moreover, the peak wavelengths and FWHM values of CBO:xEu<sup>2+</sup> are basically unchanged for different Eu<sup>2+</sup> doping concentrations (Fig. 3a). The corresponding PLE spectrum of CBO:0.04Eu<sup>2+</sup> monitored at 640 nm exhibits a broad band from 560 to 750 nm, indicating that it can be excited by blue to red light.

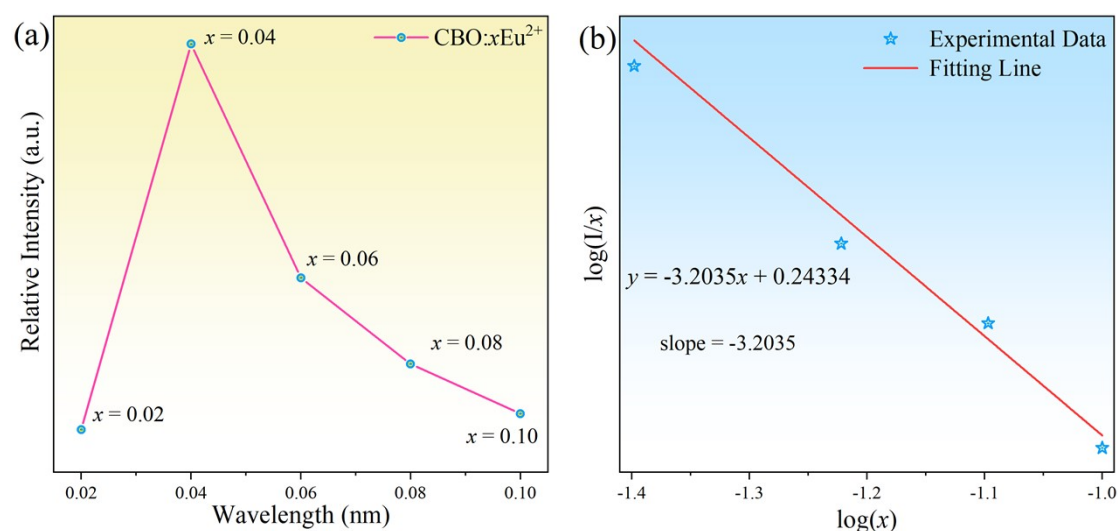

**Figure S3.** (a) The relative intensity of CBO:xEu<sup>2+</sup> dependent on the Eu<sup>2+</sup> content. (d) Fitting line of log(I/x) versus log(x) in CBO:xEu (x = 0.04–0.10) phosphors.

The nonradiative energy migration mainly contains three possible pathways: electric–multipolar interaction, radiation reabsorption, and exchange interaction ( $R_c$ ) between activators. To clarify the energy-transfer mechanism of CBO:xEu<sup>2+</sup>, the critical distance was calculated by eq 1:<sup>1</sup>

$$R_c = 2\left(\frac{3V}{4\pi x_c N}\right)^{1/3} \quad (1)$$

where  $x_c$  represents the optimized concentration of Eu<sup>2+</sup> in the CBO host,  $V$  stands for the unit cell volume, and  $N$  denotes the number of ion sites for Eu<sup>2+</sup> per unit cell. For the CBO host,  $x_c = 0.04$ ,  $N = 6$ , and  $V = 765.61 \text{ \AA}^3$  calculates that the  $R_c$  value is about 12.66  $\text{\AA}$ . It is well-known that exchange interaction is the dominant role only if  $R_c$  is shorter than 5  $\text{\AA}$ , and thus the concentration quenching in CBO:xEu is more likely through the electric–multipolar interaction. Moreover, the multipolar interaction type can be determined by the following equation 2:

$$\frac{I}{x} = k[1 + \beta(x)^{\frac{\theta}{3}}]^{-1} \quad (2)$$

where  $I$  is the emission intensity at the current concentration,  $x$  means the Eu<sup>2+</sup> concentration, and the values of  $k$  and  $\beta$  are constant. The constant  $\theta$  determines the type of electric-multipolar interaction, for which  $\theta = 6, 8,$  and  $10$  refers to dipole-dipole (d-d), dipole-quadrupole (d-q), and quadrupole-quadrupole (q-q) interactions,<sup>2-4</sup> respectively, whereas  $\theta = 3$  represents the energy migration between nearest or next nearest Eu<sup>2+</sup> cations. Equation 2 can be reduced to eq 3 because  $\beta(x)^{\theta/3} \gg 1$ , as follows:

$$\log\left(\frac{I}{x}\right) = K - \frac{\theta}{3}\log x \quad (K = \log k - \log b) \quad (3)$$

Fig. S3b shows the dependence of log(I/x) on log(x), which can be fitted linearly, and the slope equals  $-3.2035$ . Thus, the  $\theta$  value is calculated as 9.6105, close to 10, implying that the quenching mechanism originates from the quadrupole-quadrupole interactions.

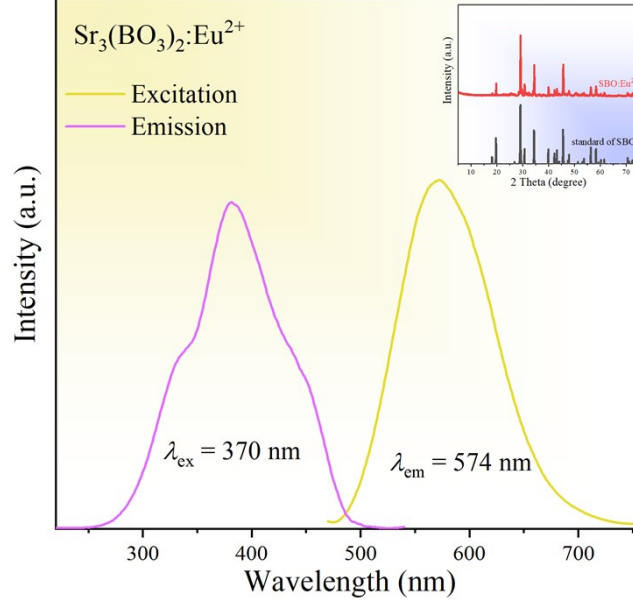

**Figure S4.** PL and PLE spectra of SBO: Eu<sup>2+</sup> phosphor, the inset shows XRD for Eu<sup>2+</sup>-doped SBO.

The external quantum efficiency (EQE) and internal quantum efficiency (IQE) of phosphor CBO:0.04Eu were measured using an integrated sphere on a FLS1000 instrument with a BaSO<sub>4</sub> blank tablet as reference (Fig. S5). The EQE and IQE, as well as absorption efficiency ( $\alpha_{abs}$ ), could be obtained by equations (4), (5), and (6):<sup>5</sup>

$$EQE = \frac{\varepsilon}{\delta} = \frac{\int L_S}{\int E_R} \quad (4)$$

$$IQE = \frac{\varepsilon}{\alpha} = \frac{\int L_S}{\int E_R - \int E_S} \quad (5)$$

$$\alpha_{abs} = \frac{\alpha}{\delta} = \frac{\int E_R - \int E_S}{\int E_R} \quad (6)$$

where  $\alpha$  means the absorbed photon numbers,  $\varepsilon$  means the emitting photon numbers,  $\delta$  represents the number of excited photons by the light source,  $L_S$  means the emission spectrum,  $E_R$  stands for the total reflection spectrum of BaSO<sub>4</sub> reference, and  $E_S$  represents the reflection spectrum of CBO:0.04Eu<sup>2+</sup>. Accordingly, the  $\alpha_{abs}$ ,  $IQE$ , and  $EQE$  for phosphor CBO:0.04Eu<sup>2+</sup> were calculated to be 24 %, 15 %, and 42 %.

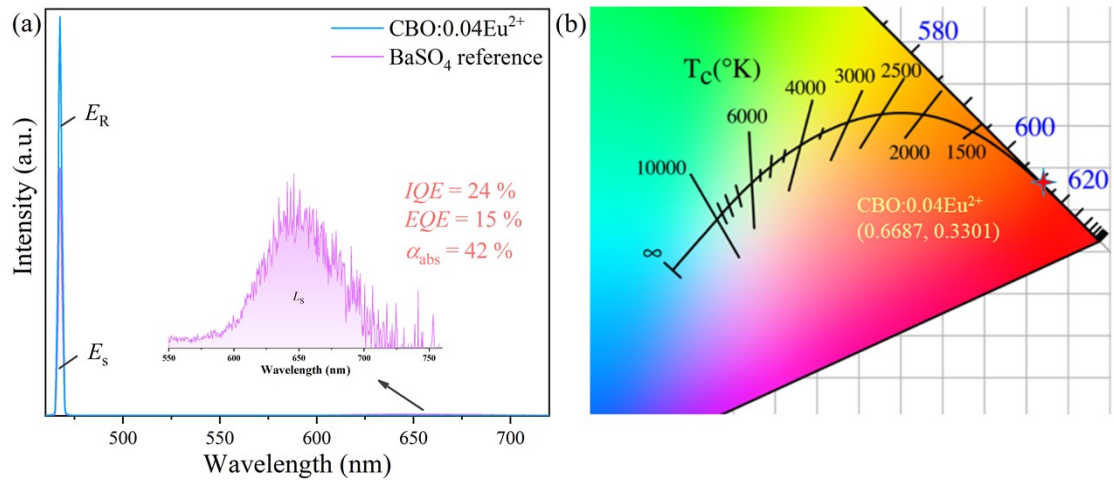

**Figure S5.** (a) excitation line of BaSO<sub>4</sub> and emission spectrum of CBO:0.04Eu<sup>2+</sup> phosphor collected by using an integrating sphere; (b) CIE chromaticity diagram of CBO:0.04Eu<sup>2+</sup>.

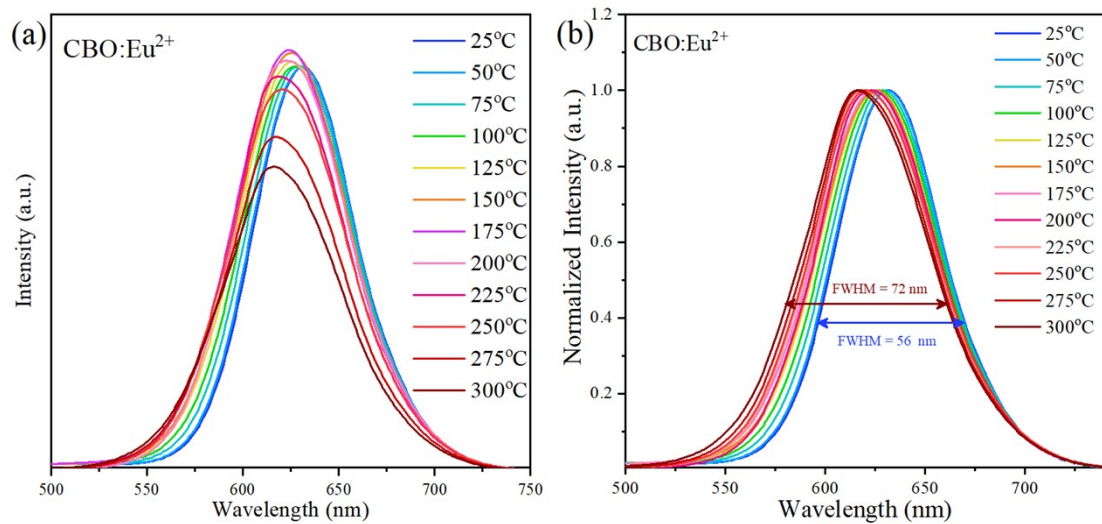

**Figure S6.** (a) The temperature-dependent PL spectra of CBO:0.04Eu<sup>2+</sup> at different temperatures from 25 to 300 °C; (b) FWHM of CBO:0.04Eu<sup>2+</sup> in different temperatures.

## Notes and references

- 1 D. L. Dexter, *J. Chem. Phys.* **1953**, 21, 836-850.
- 2 G. Blasse, *Philips Res. Rep.* **1969**, 24, 131-144.
- 3 G. Blasse, *Phys. Lett. A.* **1968**, 28 (6), 444-445.
- 4 L.G. Van Uitert, *J. Lumin.* **1984**, 29, 1-9.
- 5 K. Ohkubo, T. Shigeta, J. Illum, *J. Illum. Eng. Inst. Jpn.* **1999**, 83, 87-93.
